# Supplementary material for: An assessment of catalytic residue 3D ensembles for the prediction of enzyme function
Source: Springer Nature journal article supplement (doi:10.1186/s12859-015-0807-6), 2015-11-04
Supplement: 12859_2015_807_MOESM1_ESM.pdf [file 12859_2015_807_MOESM1_ESM.pdf]

B; 1q6l, A; 1q6x, A; 1qam, A; 1qaz, A; 1qb4, A; 1qba, A; 1qcn, A; 1qe3, A; 1qfe, A; 1qfl, B; 1qfm, A; 1qfn, A; 1qgn, A; 1qgx, A; 1qh9, A; 1qhf, A; 1qhg, A; 1qho, A; 1qi9, A; 1qj4, A; 1qk2, A; 1qlh, A; 1qq5, A; 1qrg, A; 1qrr, A; 1qrz, A; 1qsg, A; 1qtn, A; 1qv0, A; 1qwn, A; 1qx3, A; 1qz9, A; 1r16, A; 1r1j, A; 1r30, A; 1r44, A; 1r4f, A; 1r4z, A; 1r51, A; 1r6w, A; 1r76, A; 1ra0, A; 1ra2, A; 1rba, A; 1rbl, A; 1rbn, A; 1req, A; 1rhc, A; 1rk2, A; 1rne, A; 1ro7, A; 1roz, A; 1rpt, A; 1rpx, A; 1rql, A; 1rtf, B; 1rtu, A; 1ru4, A; 1s2k, A; 1s3i, A; 1s95, A; 1sca, A; 1ses, A; 1sll, A; 1sme, A; 1smn, A; 1snn, A; 1snz, A; 1sox, A; 1ssx, A; 1stc, E; 1std, A; 1szd, A; 1szj, G; 1t0u, A; 1t7d, A; 1tah, A; 1tde, A; 1tdj, A; 1teh, A; 1thg, A; 1tht, A; 1ti6, A; 1tlp, E; 1tml, A; 1tph, 1; 1trk, A; 1tyf, A; 1tys, A; 1uae, A; 1uag, A; 1uaq, A; 1uas, A; 1uch, A; 1uf7, A; 1ujn, B; 1uk7, A; 1ula, A; 1un1, A; 1uok, A; 1uqr, A; 1uqt, A; 1uro, A; 1ush, A; 1uw8, A; 1v04, A; 1v0e, A; 1v0y, A; 1v25, A; 1vao, A; 1vas, A; 1vid, A; 1vie, A; 1vnc, A; 1vq1, A; 1vr7, A; 1vzx, A; 1vzz, B; 1w0h, A; 1w1o, A; 1wd8, A; 1wnw, A; 1x7d, A; 1x9h, A; 1x9y, A; 1xff, A; 1xqd, A; 1xs1, B; 1xs1, A; 1xtc, A; 1xva, A; 1xx2, A; 1xyz, A; 1y9m, A; 1ybv, A; 1ycf, A; 1ylu, A; 1ysc, A; 1ytw, A; 1z9h, A; 1ze1, A; 1zio, A; 1zym, A; 206l, A; 2a0n, A; 2a86, A; 2aat, A; 2abk, A; 2ace, A; 2acu, A; 2acy, A; 2adm, A; 2alr, A; 2amg, A; 2apr, A; 2ayh, A; 2bbk, M; 2bkr, A; 2bmi, A; 2cnd, A; 2cpo, A; 2cpu, A; 2dhn, A; 2dln, A; 2dor, A; 2dw7, A; 2ebn, A; 2eng, A; 2eql, A; 2f61, A; 2f9z, C; 2gb0, A; 2gsa, A; 2hdh, A; 2hgs, A; 2hi7, B; 2isd, A; 2jcw, A; 2jxr, A; 2lip, A; 2lpr, A; 2nac, A; 2nmt, A; 2oat, A; 2ocp, A; 2pec, A; 2pfl, A; 2pgd, A; 2phk, A; 2plc, A; 2pth, A; 2rnf, A; 2tdt, A; 2thi, A; 2tmd, A; 2toh, A; 2tpl, B; 2tps, A; 2xis, A; 2ypn, A; 3cla, A; 3csm, A; 3eca, A; 3nos, A; 3pca, M; 3pva, A; 3r1r, A; 4kbp, A; 4mdh, A; 5cox, A; 5cpa, A; 5eat, A; 5enl, A; 5fit, A; 5rsa, A; 7atj, A; 7nn9, A; 7odc, A; 8pch, A; 8tln, E;
